# Supplementary material
Source: HighWire-hosted journal article supplement (https://tobaccocontrol.bmj.com/highwire/filestream/165653/field_highwire_adjunct_files/0/tc-2022-057726supp001_data_supplement.pdf)
Supplement: tc-2022-057726supp001_data_supplement.pdf [file tc-2022-057726supp001_data_supplement.pdf]

## **SUPPLEMENTARY MATERIALS**

### **1 THE ECONOMIC BURDEN OF TOBACCO USE IN PAKISTAN**

**Table I: Sampling detail**

| Base     | Sampling Parameters |               |      |        |              |               | Sample Size           |          |        |
|----------|---------------------|---------------|------|--------|--------------|---------------|-----------------------|----------|--------|
|          | r                   | Design Effect | RME  | pb     | Avg. HH Size | Response Rate | HHs                   | Clusters | Blocks |
| Urban    | 0.124               | 2             | 0.05 | 0.6401 | 6.2          | 0.95          | 5996                  | 20       | 300    |
| Rural    | 0.124               | 2             | 0.05 | 0.5721 | 6.6          | 0.95          | 6302                  | 20       | 315    |
| Pakistan |                     |               |      |        |              |               | 12298 $\approx$ 13000 |          | 615    |

**Table II. Population and sample distribution across different administrative units**

| Administrative Unit     | Population (Households) |         | Sample |         |
|-------------------------|-------------------------|---------|--------|---------|
|                         | No. (in thousands)      | percent | No.    | percent |
| Punjab                  | 17103.84                | 53.11   | 6904   | 53.11   |
| Khyber Pakhtunkhwa (KP) | 3845.17                 | 11.94   | 1552   | 11.94   |
| Sindh                   | 8585.61                 | 26.66   | 3466   | 26.66   |
| Balochistan             | 1775.94                 | 5.51    | 717    | 5.51    |
| FATA                    | 558.38                  | 1.73    | 225    | 1.73    |
| Islamabad               | 336.18                  | 1.04    | 136    | 1.04    |
| Pakistan                | 32205.11                | 100     | 13000  | 100     |

**Table III. Descriptive analysis**

| Indicator                                          | Overall  | 15 and above | 35 and above |
|----------------------------------------------------|----------|--------------|--------------|
| Age                                                | 24.54    | 34.56        | 49.56        |
| Male (%)                                           | 52.72    | 52.81        | 51.94        |
| Education (years)                                  | 7.01     | 8.98         | 8.73         |
| Household size                                     | 6.84     | 4.35         | 2.13         |
| Employment (%)                                     | 31.45    | 37.01        | 42.91        |
| Income                                             | 18544.81 | 18611.53     | 20810.69     |
| Observations                                       | 82889    | 52767        | 22917        |
| Source: Author's calculation from the study survey |          |              |              |

**Table IV. Prevalence of tobacco and smoking**

| Panel                                              | Tobacco | Smoking | Tobacco | Smoking |
|----------------------------------------------------|---------|---------|---------|---------|
| <b>A. Region</b>                                   |         |         |         |         |
| Pakistan                                           | 19.14   | 8.82    | 19.1    | 10.5    |
| Rural                                              | 19.8    | 8.87    | 21.1    | 11.2    |
| Urban                                              | 18.44   | 8.77    | 15.9    | 9.3     |
| <b>B. Gender</b>                                   |         |         |         |         |
| Male                                               | 31.74   | 16.13   | 31.8    | 19.4    |
| Female                                             | 4.98    | 0.62    | 5.8     | 1       |
| <b>C. Province</b>                                 |         |         |         |         |
| Punjab                                             | 14.28   | 8.48    | ---     | ---     |
| Sindh                                              | 25.59   | 9.75    | ---     | ---     |
| KP                                                 | 16.98   | 4.67    | ---     | ---     |
| Balochistan                                        | 26.02   | 14.43   | ---     | ---     |
| <b>D. Age</b>                                      |         |         |         |         |
| 15-34                                              | 10.58   | 3.93    | ---     | ---     |
| 35-64                                              | 29.28   | 15.07   | ---     | ---     |
| 65 & above                                         | 36.33   | 15.9    | ---     | ---     |
| Source: Author's calculation from the study survey |         |         |         |         |

**Table V. Disease prevalence**

| Panel                                              | Diseases                | Hospitalization (%) | Outpatient visit (%) |
|----------------------------------------------------|-------------------------|---------------------|----------------------|
| <b>A. Region</b>                                   |                         |                     |                      |
| Pakistan                                           | Cancer                  | 7.19                | 5.36                 |
|                                                    | Cardiovascular diseases | 7.34                | 7.98                 |
|                                                    | Respiratory diseases    | 3.75                | 4.27                 |
| Rural                                              | Cancer                  | 7.37                | 5.62                 |
|                                                    | Cardiovascular diseases | 6.85                | 7.55                 |
|                                                    | Respiratory diseases    | 3.94                | 4.06                 |
| Urban                                              | Cancer                  | 6.97                | 5.06                 |
|                                                    | Cardiovascular diseases | 7.93                | 8.46                 |
|                                                    | Respiratory diseases    | 3.53                | 4.51                 |
| <b>B. Gender</b>                                   |                         |                     |                      |
| Male                                               | Cancer                  | 9.21                | 5.14                 |
|                                                    | Cardiovascular diseases | 9.21                | 7.35                 |
|                                                    | Respiratory diseases    | 4.48                | 5.14                 |
| Female                                             | Cancer                  | 5.49                | 5.52                 |
|                                                    | Cardiovascular diseases | 5.77                | 8.46                 |
|                                                    | Respiratory diseases    | 3.14                | 3.59                 |
| <b>C. Province</b>                                 |                         |                     |                      |
| Punjab                                             | Cancer                  | 5.84                | 4.35                 |
|                                                    | Cardiovascular diseases | 13.68               | 10.73                |
|                                                    | Respiratory diseases    | 4.18                | 5                    |
| Sindh                                              | Cancer                  | 7.41                | 3.69                 |
|                                                    | Cardiovascular diseases | 6.33                | 3.9                  |
|                                                    | Respiratory diseases    | 2.63                | 4.32                 |
| KP                                                 | Cancer                  | 12.94               | 9.21                 |
|                                                    | Cardiovascular diseases | 14.42               | 9.14                 |
|                                                    | Respiratory diseases    | 3.7                 | 2.58                 |
| Balochistan                                        | Cancer                  | 6.57                | 6.71                 |
|                                                    | Cardiovascular diseases | 3.68                | 2.03                 |
|                                                    | Respiratory diseases    | 3.93                | 3.92                 |
| Source: Author's calculation from the study survey |                         |                     |                      |

**Table VI. Present discounted value of lifetime earnings (million PKR)**

| Age groups | Rural |        | Urban |        |
|------------|-------|--------|-------|--------|
|            | Male  | Female | Male  | Female |
| 35-39      | 7.81  | 4.55   | 9.3   | 9.03   |
| 40-44      | 6.9   | 5.28   | 8.7   | 4.3    |
| 45-49      | 6.4   | 4.66   | 7.76  | 4.83   |
| 50-54      | 4.79  | 2.19   | 6.66  | 4.55   |
| 55-59      | 4.09  | 3.95   | 5.47  | 4.36   |
| 60-64      | 1.5   | 0.83   | 1.95  | 6.22   |
| 65-69      | 1.06  | 0.86   | 1.51  | 0.95   |
| 70-74      | 0.71  | 0.5    | 0.81  | 0.41   |
| 75-79      | 0.5   | 0.1    | 0.7   | 0      |
| 80-84      | 0.27  | 0.23   | 0.34  | 0.04   |
| 85+        | 0     | 0      | 0     | 0      |

Source: Authors' calculations from the study survey, Labour Force Survey (2017–18), and Pakistan Economic Survey (2018–19)

**Table VII. RRs, smoking prevalence, and SAF for all-cause mortality**

| Region                                                    | Disease Group | Male      |       |      |       |      | Female    |       |      |      |      |
|-----------------------------------------------------------|---------------|-----------|-------|------|-------|------|-----------|-------|------|------|------|
|                                                           |               | 35+<br>RR | 35-64 |      | 65+   |      | 35+<br>RR | 35-64 |      | 65+  |      |
|                                                           |               |           | Pe    | SAF  | Pe    | SAF  |           | Pe    | SAF  | Pe   | SAF  |
| Panel A. Mortality Ratio Approach                         |               |           |       |      |       |      |           |       |      |      |      |
| Rural                                                     | All Diseases  | 1.28      | 28.85 | 0.07 | 25.72 | 0.07 | 2.53      | 1.31  | 0.02 | 1.84 | 0.03 |
| Urban                                                     | All Diseases  | 1.28      | 27.81 | 0.07 | 28.23 | 0.07 | 2.53      | 0.92  | 0.01 | 1.06 | 0.02 |
| <i>Notes.</i> Authors' calculations using the survey data |               |           |       |      |       |      |           |       |      |      |      |



**Table VIII. Comparison of economic cost of smoking with outcome indicators**

| Outcome indicator                                                                                                                                                                                                                                                                                                                                                                                                                                                                                                                                                                                                    | Unit (PKR) | Value  |
|----------------------------------------------------------------------------------------------------------------------------------------------------------------------------------------------------------------------------------------------------------------------------------------------------------------------------------------------------------------------------------------------------------------------------------------------------------------------------------------------------------------------------------------------------------------------------------------------------------------------|------------|--------|
| The total economic cost of smoking from three major diseases (2019)                                                                                                                                                                                                                                                                                                                                                                                                                                                                                                                                                  | Billion    | 437.8  |
| The total direct cost of smoking from three major diseases (2019)                                                                                                                                                                                                                                                                                                                                                                                                                                                                                                                                                    | Billion    | 100.3  |
| Revenue from tobacco (smoking) taxation (2018–19)*                                                                                                                                                                                                                                                                                                                                                                                                                                                                                                                                                                   | Billion    | 120    |
| Public sector health expenditure on health                                                                                                                                                                                                                                                                                                                                                                                                                                                                                                                                                                           | Billion    | 421.8  |
| Total health expenditures **                                                                                                                                                                                                                                                                                                                                                                                                                                                                                                                                                                                         | Billion    | 1208.5 |
| GDP at current prices (2018–19)                                                                                                                                                                                                                                                                                                                                                                                                                                                                                                                                                                                      | Billion    | 37972  |
| Cost of smoking (% of GDP)                                                                                                                                                                                                                                                                                                                                                                                                                                                                                                                                                                                           | %          | 1.15%  |
| Tobacco revenue (% of the cost of smoking)                                                                                                                                                                                                                                                                                                                                                                                                                                                                                                                                                                           | %          | 27%    |
| Direct cost as (% of total health expenditures)                                                                                                                                                                                                                                                                                                                                                                                                                                                                                                                                                                      | %          | 8.3%   |
| Sources: Data sources include Pakistan Economic Survey (2019–20); Pakistan Bureau of Statistics, National Health Accounts (2015–16) and Ministry of Finance, Government of Pakistan.                                                                                                                                                                                                                                                                                                                                                                                                                                 |            |        |
| Notes: * The major taxed tobacco product in Pakistan is cigarettes. Hence, the revenue from tobacco taxation primarily comes from cigarette taxation. ** The data for Total Health Expenditure is not officially available for the year 2018–19. The last National Health Account report is available for 2015–16. The Total Health Expenditure according to that report was PKR. 908 billion, which was a 20 percent increase (in nominal terms) over the value reported in 2013–14. Assuming the same rate of growth, the authors project the Total Health Expenditure for 2018–19 as reported in the table above. |            |        |
